# Supplementary material
Source: publisher figshare collection journal article supplement (https://diabetesjournals.figshare.com/ndownloader/files/38906568)
Supplement: Supplementary file 1 [file 38906568]

**Electronic supplementary material**

**Methods**

**Assessment of T1D Genetic Risk score**

We extracted DNA from all participants whole blood EDTA samples, and performed genotyping using illumine GSA2 genome wide genotyping array with 1,697,069 genotyped variants, including 748,291 with minor allele frequency <0.01 as previously described(1; 2). Genotyping was performed at Erasmus on an Ilumina Global screening array version 2 with preliminary quality control checks performed at Exeter University. The HLA haplotype score (HLA DR haplotype from tag variants) was added to the score of the remainingvariants each multiplied by the natural log of the odds ratio and finally divided by the number of alleles. T1DGRS calculation was not performed if genotyping results were missing for either of the two alleles with the greatest weighting (DR3/DR4-DQ8 or HLA-DRB1-15) or if more than two of any other SNPs were missing(1).

**ESM table 1**: Baseline clinical characteristics of the entire StartRight study split by median age of diagnosis of those positive for ≥2 islet autoantibodies. Results shown are percentage for binary outcomes and mean for continuous data (95% CI). * Severe insulin deficiency defined as C-peptide <200pmol/l.

|  | **Diabetes diagnosed <=35, n=470** | **Diabetes diagnosed >35, n=1,323** | **p** |
| --- | --- | --- | --- |
| **Baseline characteristics** |  | | |
| Age at diagnosis | 27.5 (27.0-28.0) | 51.7 (51.1-52.3) | <0.0001 |
| Duration (months) | 4.4 (4.0-4.7) | 5.1 (4.9-5.3) | 0.0001 |
| BMI kg/m2 | 27.2 (26.5-27.8) | 30.6 (30.2-31.0) | <0.0001 |
| Gender (male) | 54% (50-59) | 60% (57-62) | 0.03 |
| White European | 87% (84-90) | 86% (84-88) | 0.8 |
| **Symptoms at presentation** |  |  |  |
| Unintentional weight loss | 66% (61-70) | 43% (40-46) | <0.0001 |
| Diabetic Ketoacidosis | 16% (12-19) | 7% (6-9) | <0.0001 |
| Osmotic symptoms | 89% (87-92) | 75% (72-77) | <0.0001 |
| **Biochemistry at presentation** |  |  |  |
| HbA1c at diagnosis mmol/mol | 98.1 (95.4-100.9) | 85.8 (84.1-87.5) | <0.0001 |
| HbA1c at diagnosis % | 11.1 (10.8-11.4) | 10.0 (9.8-10.2) | <0.0001 |
| Glucose at diagnosis mmol/l | 19.2 (18.3-20.1) | 18.4 (17.6-19.1) | 0.2 |
| **Management at presentation** |  |  |  |
| Hospitalised at admission | 47% (42-51) | 27% (24-29) | <0.0001 |
| Initial insulin | 76% (72-79) | 37% (35-40) | <0.0001 |
| Initial tablets (+/- insulin) (%) | 25% (21-29) | 46% (43-48) | <0.0001 |
| **Recruitment characteristics** |  |  |  |
| Geometric C-peptide pmol/l | 643.7 (591.1-701.1) | 1138.0 (1076.1-1203.4) | <0.0001 |
| Geometric UCPCR (nmol/mmol) | 1.3 (1.2-1.4) | 1.9 (1.7-2.0) | <0.0001 |
| Insulin deficiency at baseline* | 6% (4-9) | 4% (3-5) | 0.02 |
| Reported type 1 at recruitment | 73% (69-77) | 31% (28-33) | <0.0001 |
| Reported type 2 at recruitment | 19% (16-23) | 61% (58-64) | <0.0001 |
| Insulin treatment at recruitment | 79% (75-83) | 40% (37-43) | <0.0001 |
| Type 1 diabetes genetic risk score | 12.4 (12.2-12.6) | 10.9 (10.7-11.0) | <0.0001 |
| On Insulin at two years follow up | 83% (79-86) | 43% (40-46) | <0.0001 |
| **Recruitment Autoantibody profile** |  |  |  |
| Single antibody positive | 64% (60-68) | 29% (26-31) | <0.0001 |
| Multi-Antibody positive | 41% (36-45) | 15% (13-16) | <0.0001 |
| GADA | 57% (53-61) | 24% (22-26) | <0.0001 |
| IA2A | 33% (29-38) | 13% (11-14) | <0.0001 |
| ZNt8A | 36% (32-40) | 15% (13-17) | <0.0001 |

**ESM table 2**: Baseline clinical characteristics of the StartRight study split by those diagnosed as type 1 diabetes by study definitions (Multi-autoantibody positive or clinician diagnosed combined with a single positive islet autoantibody) and type 2 diabetes (Clinician diagnosed, initial treatment without insulin, and autoantibody negative). Results shown are percentage for binary outcomes and mean for continuous data (95% CI). * Severe insulin deficiency defined as C-peptide <200pmol/l

|  | **Type 1 Diabetes**  n=565 | **Type 2 Diabetes**  n=715 | **p** |
| --- | --- | --- | --- |
| **Baseline characteristics** |  | | |
| Age at diagnosis | 38.6 (37.4-39.8) | 50.5 (49.6-51.4) | <0.0001 |
| Duration (months) | 4.6 (4.3-4.9) | 5.6 (5.3-5.8) | <0.0001 |
| BMI kg/m2 | 25.0 (24.7-25.4) | 33.4 (32.9-34.0) | <0.0001 |
| Gender (male) | 52% (47-56) | 57% (53-61) | 0.06 |
| White European ethnicity | 91% (88-93) | 86% (83-88) | 0.01 |
| **Symptoms at presentation** |  |  |  |
| Unintentional weight loss | 83% (80-86) | 16% (13-18) | <0.0001 |
| Diabetic Ketoacidosis | 20% (17-23) | 0% (0-0) | <0.0001 |
| Osmotic symptoms | 94% (92-96) | 62% (58-65) | <0.0001 |
| **Biochemistry at presentation** |  |  |  |
| HbA1c at diagnosis mmol/mol | 104.3 (102.0-106.6) | 69.3 (67.5-71.1) | <0.0001 |
| HbA1c at diagnosis % | 11.7 (11.5-11.9) | 8.5 (8.3-8.7) | <0.0001 |
| Glucose at diagnosis mmol/l | 20.9 (20.1-21.8) | 12.1 (11.3-12.8) | <0.0001 |
| **Management at presentation** |  |  |  |
| Hospitalised at admission | 51% (47-55) | 6% (4-7) | <0.0001 |
| Initial insulin | 88% (86-91) | 0% (0-0) | <0.0001 |
| Initial tablets (+/- insulin) (%) | 17% (14-20) | 62% (58-66) | <0.0001 |
| **Recruitment characteristics** |  |  |  |
| Geometric C-peptide pmol/l | 429.0 (394.7-463.2) | 1786.1 (1699.5-1872.7) | <0.0001 |
| Geometric UCPCR (nmol/mmol) | 1.0 (0.9-1.1) | 2.6 (2.4-2.8) | <0.0001 |
| Insulin deficiency at baseline* | 11% (8-13) | 0% (0-1) | <0.0001 |
| Reported type 1 at recruitment | 94% (92-96) | 0% (0-0) | <0.0001 |
| Reported type 2 at recruitment | 3% (1-4) | 100% (100-100) | <0.0001 |
| Insulin treatment at recruitment | 95% (94-97) | 1% (0-2) | <0.0001 |
| Type 1 diabetes genetic risk score | 13.1 (12.9-13.2) | 10.1 (9.9-10.3) | <0.0001 |

**ESM table 3**: HLA and islet autoantibody distribution by age of diagnosis is those classified as having type 1 diabetes (either multi-autoantibody positive or clinician diagnosed combined with a single positive islet autoantibody). Results shown are percentage for binary outcomes (95% CI).

|  | **≤35 Years (n=275)** | **>35 Years**  **(n=290)** | **p** |
| --- | --- | --- | --- |
| ≥1 copy of DR3-DQ2 | 49% (40-57) | 49% (40-57) | 0.99 |
| ≥1 copy of DR4-DQ8 | 47% (38-55) | 39% (30-48) | 0.08 |
| **HLA Breakdown** |  | | |
| DR15-DQ6 | 2% (0-14) | 3% (0-14) | 0.8 |
| DR3-DQ2/DR4-DQ8 | 18% (7-29) | 14% (2-25) | 0.2 |
| DR4-DQ8/DR4-DQ8 | 6% (0-18) | 5% (0-17) | 0.8 |
| DR3-DQ2/DR3-DQ2 | 9% (0-20) | 13% (2-24) | 0.09 |
| DR4-DQ8/X | 23% (12-33) | 20% (9-31) | 0.4 |
| DR3-DQ2/X | 22% (11-32) | 21% (10-31) | 0.8 |
| X/X | 21% (10-31) | 24% (14-35) | 0.3 |
| **Islet Autoantibodies** |  | | |
| GADA | 91% (88-95) | 90% (87-94) | 0.6 |
| IA-2A | 54% (48-60) | 57% (51-63) | 0.5 |
| ZNT8 | 60% (54-65) | 60% (54-65) | 0.99 |

**ESM table 4**: In adult-onset type 1 diabetes defined by multi-autoantibody positivity impact of BMI evaluated continuously using: linear regression for continuous variables, logistic regression for binary variables and using mixed effect models for annual change in Log C-peptide. (95% CI).

| **Continuous** | **β coefficient** | **P value** |
| --- | --- | --- |
| **Age at diagnosis** | 0.2 (-0.1, 0.5) | 0.3 |
| **HbA1c at diagnosis mmol/mol** | -0.3 (-0.9, 0.3) | 0.3 |
| **Glucose at diagnosis mmol/l** | 0.0 (-0.2, 0.3) | 0.8 |
| **Baseline geometric C-peptide pmol/l** | 33 (21, 46) | <0.0001 |
| **Annual rate of decline of log UCPCR (nmol/mmol)** | 0.00 (-0.01, 0.01) | 0.8 |
| **T1DGRS** | -0.01 (-0.05, 0.04) | 0.8 |
| **Binary** | **Odds ratio** | **P value** |
| **Unintentional weight loss** | 0.94 (0.89-0.99) | 0.02 |
| **Diabetic Ketoacidosis** | 1.02 (0.97, 1.08) | 0.4 |
| **Osmotic symptoms** | 1.08 (0.97, 1.20) | 0.2 |

**ESM figure 1: Study flow chart**


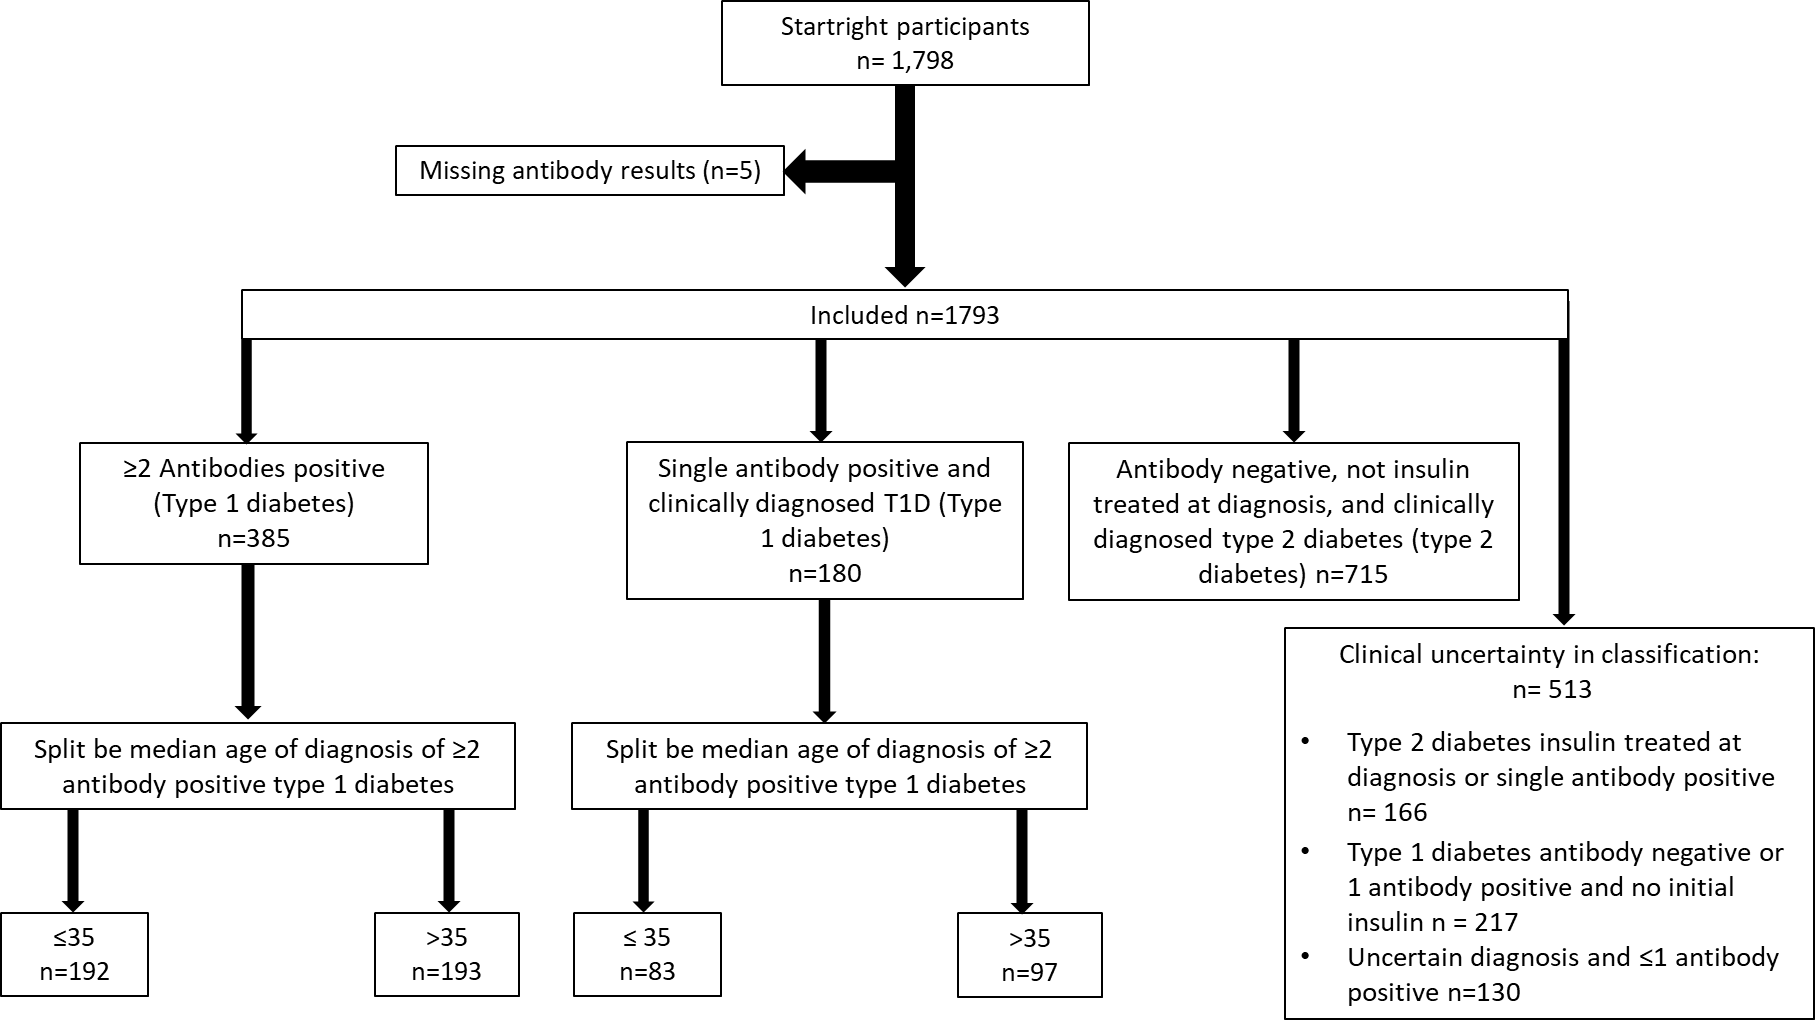


**ESM figure 2:** The percentage annual Loss of C-peptide measured by UCPCR by decile of age of diagnosis for those classified as having type 1 diabetes (either multi autoantibody positivity or clinician diagnosis confirmed by a single positive autoantibody). Error bars are 95% confidence intervals.

**
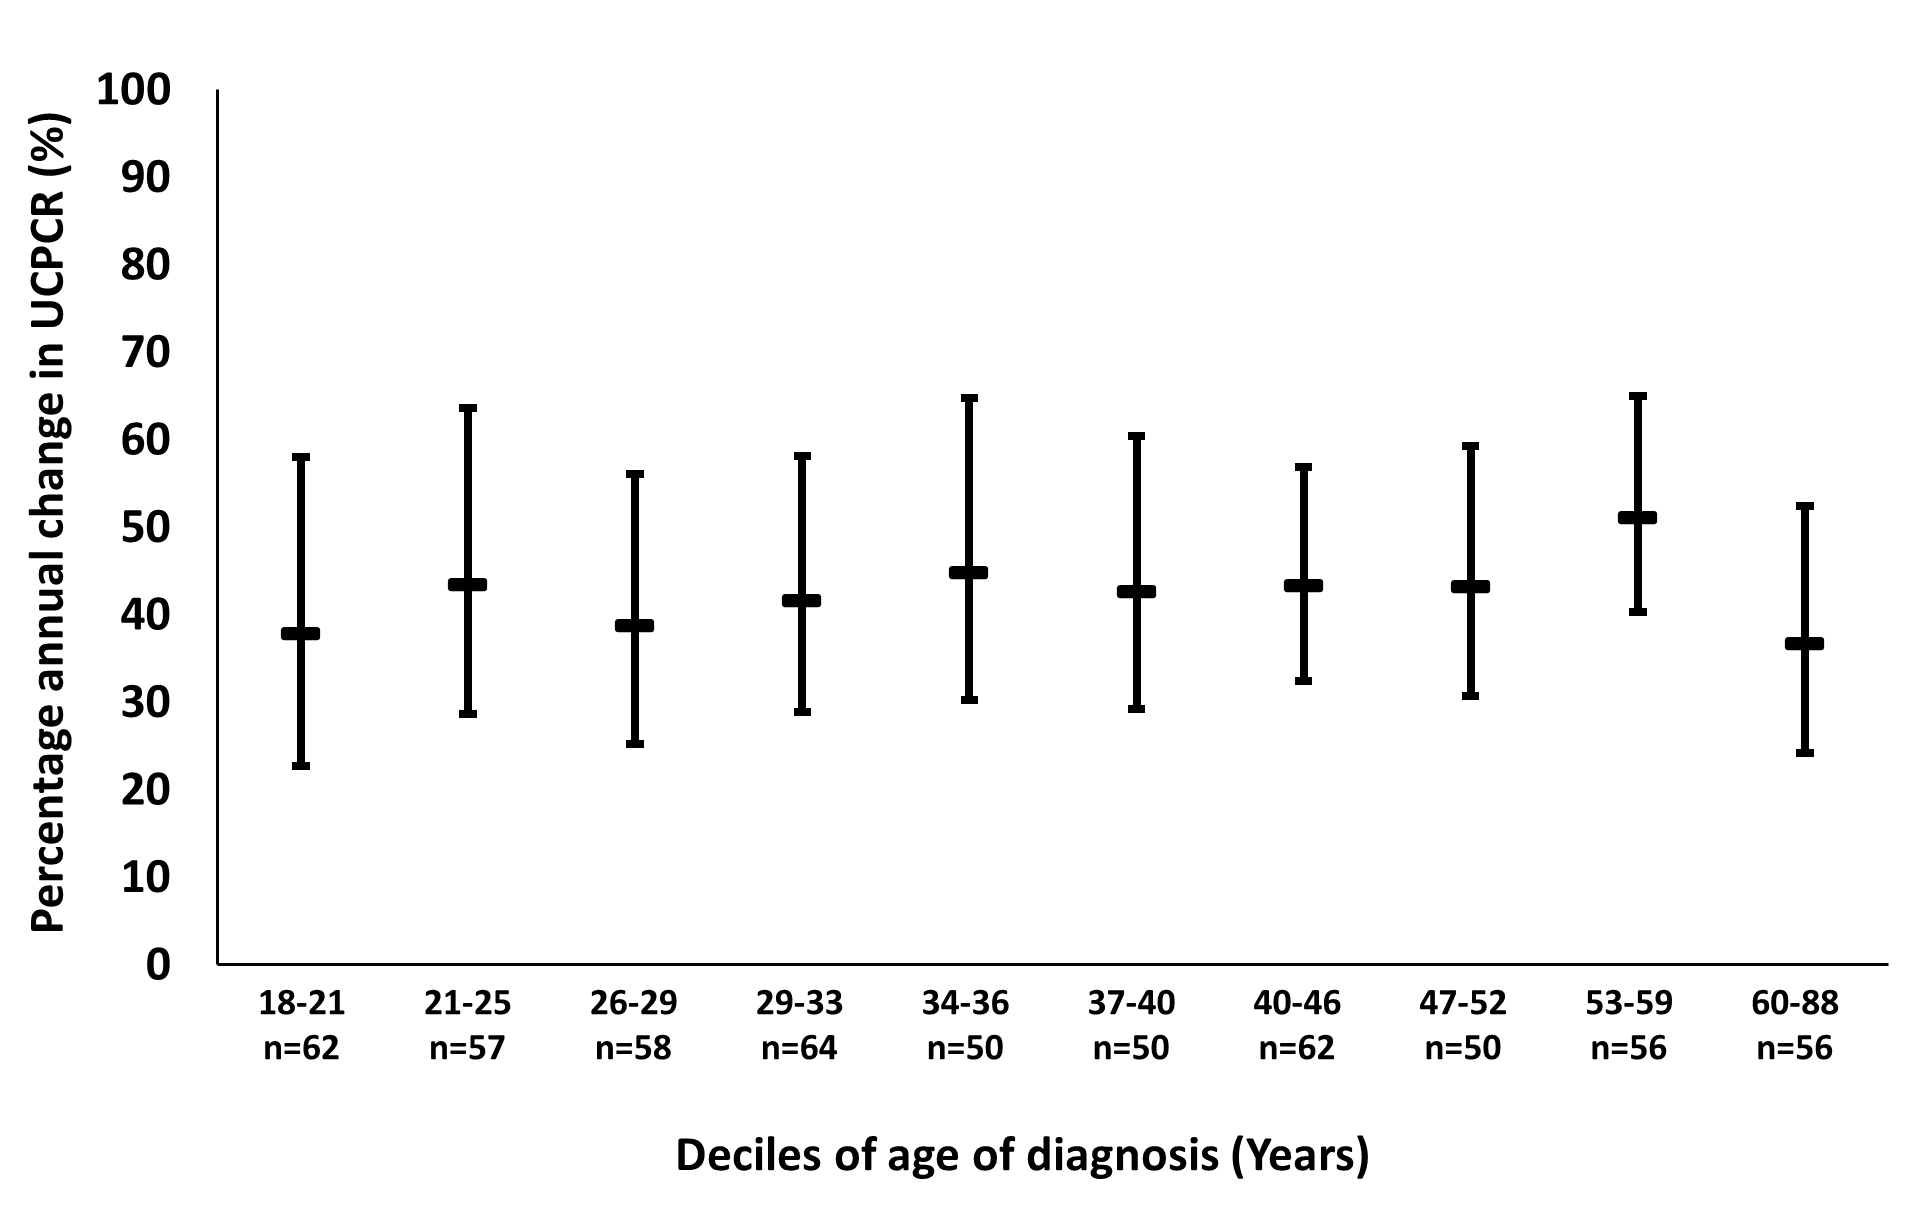
**

**ESM figure 3:** Loss of C-peptide measured by UCPCR (on log scale) in multi-antibody positivity participants split by insulin treatment received within 2 weeks of diagnosis. Error bars are 95% confidence intervals


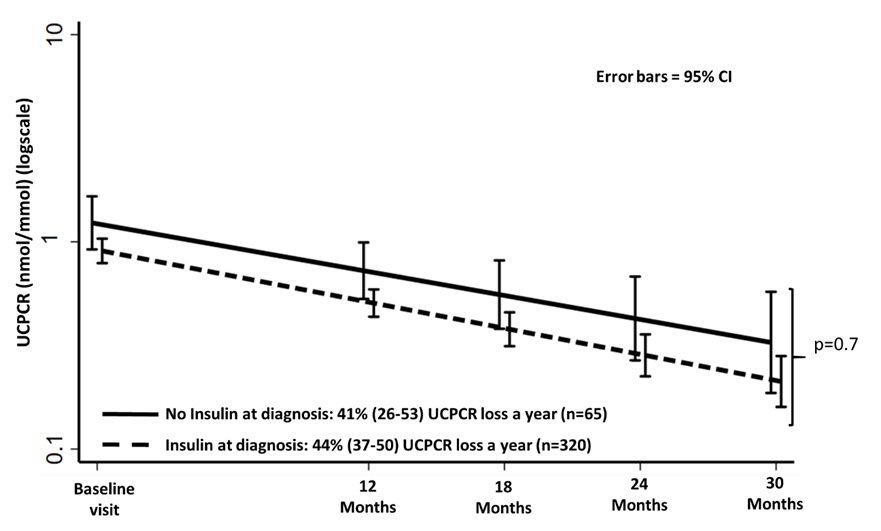


**ESM figure 4:** Type 1 diabetes genetic risk score (T1DGRS) in multi-antibody positivity participants split by insulin treatment received within 2 weeks of diagnosis. Mean and 95% confidence intervals shown.


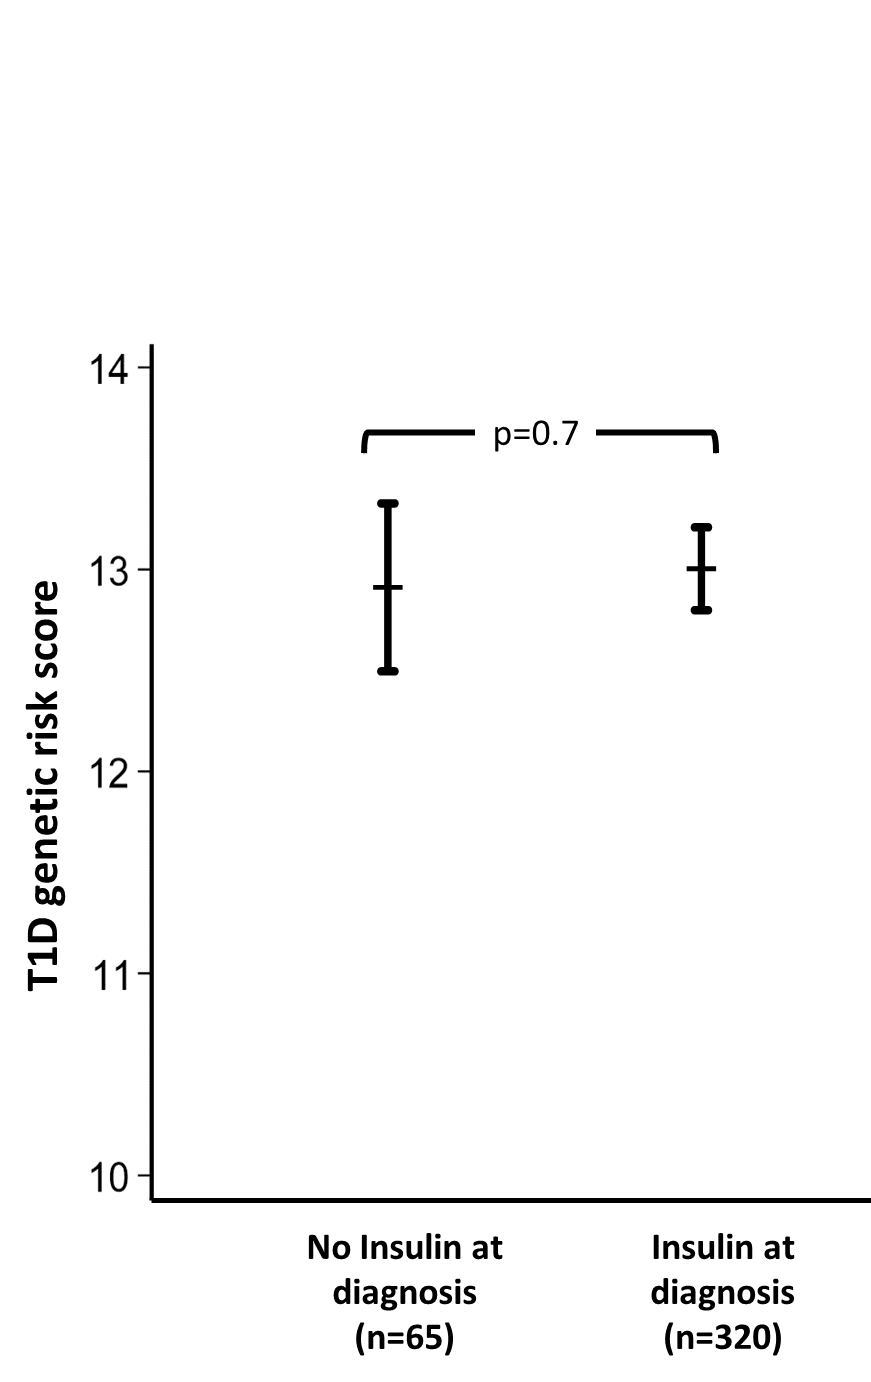


**ESM figure 5:** Loss of C-peptide measured by UCPCR (on log scale) in those with a clinical diagnosis of type 1 diabetes split by number of positive autoantibodies: ≥2 positive autoantibodies vs 1 positive autoantibody. Error bars are 95% confidence intervals


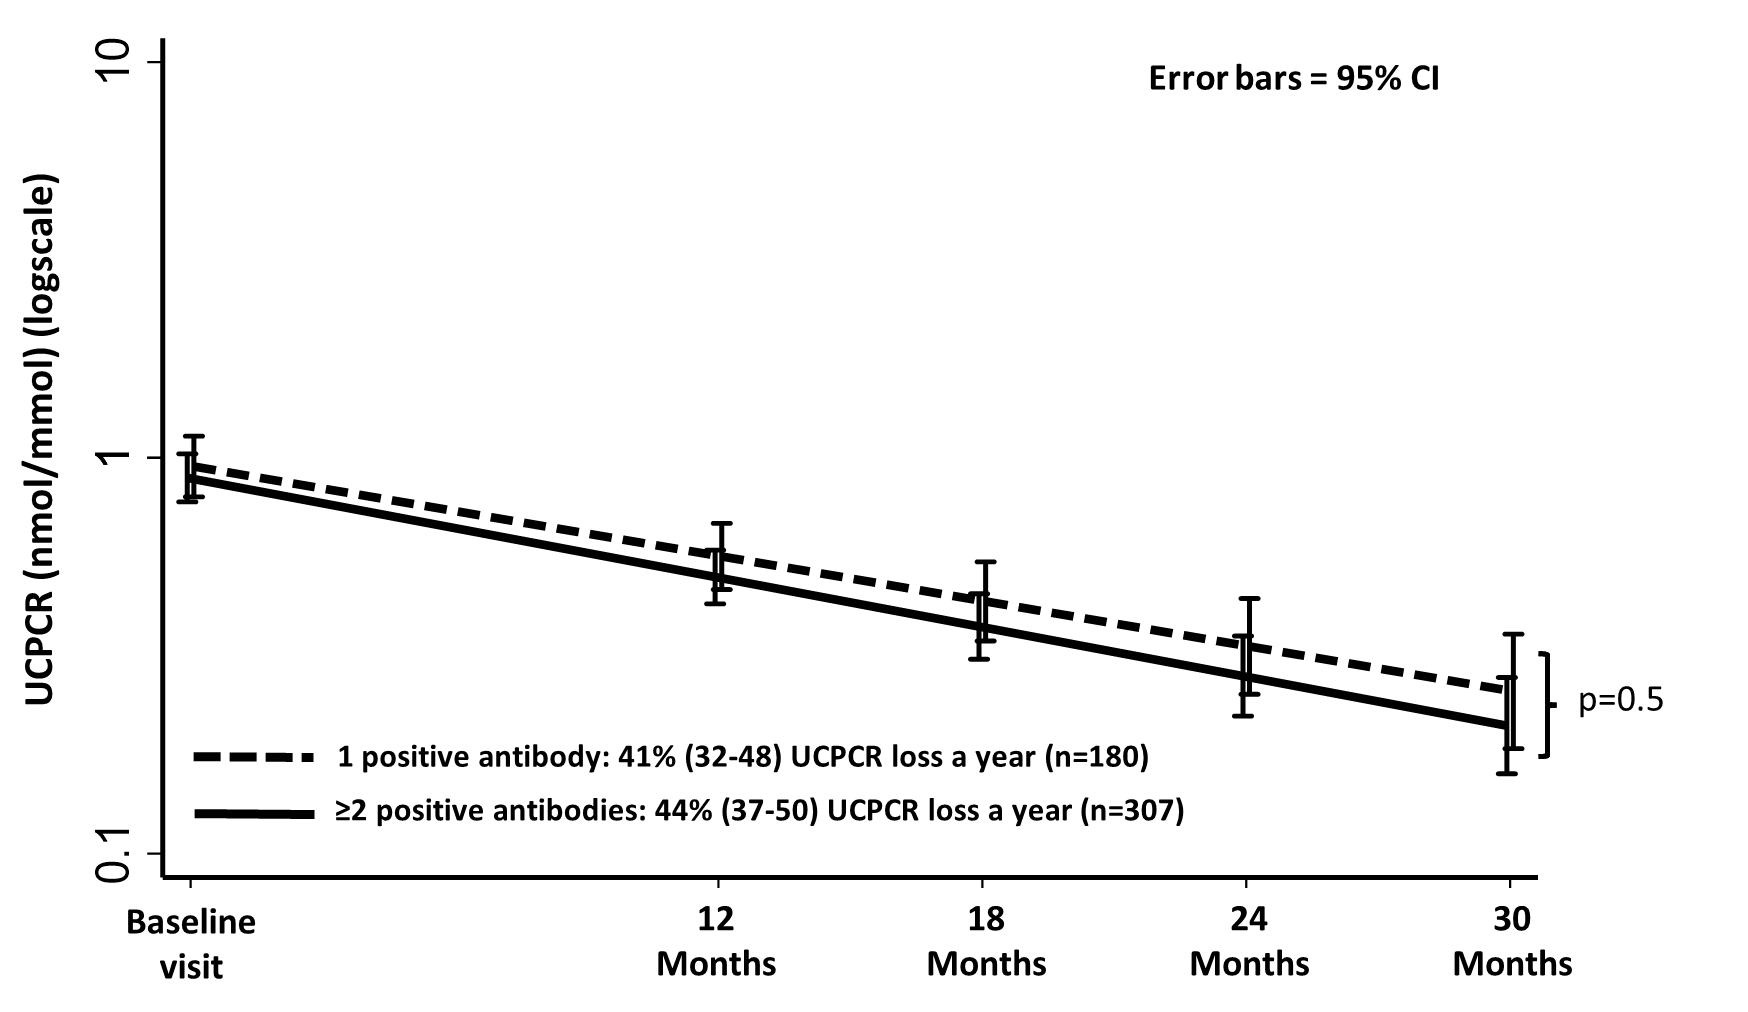


1. Oram RA, Sharp SA, Pihoker C, Ferrat L, Imperatore G, Williams A, Redondo MJ, Wagenknecht L, Dolan LM, Lawrence JM, Weedon MN, D'Agostino R, Hagopian WA, Divers J, Dabelea D. Utility of Diabetes Type-Specific Genetic Risk Scores for the Classification of Diabetes Type Among Multiethnic Youth. Diabetes Care 2022;45:1124-1131

2. Sharp SA, Rich SS, Wood AR, Jones SE, Beaumont RN, Harrison JW, Schneider DA, Locke JM, Tyrrell J, Weedon MN, Hagopian WA, Oram RA. Development and Standardization of an Improved Type 1 Diabetes Genetic Risk Score for Use in Newborn Screening and Incident Diagnosis. Diabetes Care 2019;42:200-207
